# Supplementary material
Source: publisher figshare collection journal article supplement (https://f1000.figshare.com/ndownloader/files/100865)
Supplement: Supplementary file 1 [file 100865]

	Donor 1		Donor 2		Donor 3		Donor 4		Donor 5		Donor 6
Time (mins)	WB Decay (nM)		WB Decay (nM)		WB Decay (nM)		WB Decay (nM)		WB Decay (nM)		WB Decay (nM)
0	174.4633	189.1049	143.2039				152.9542		137.835		119.8645
5	112.8502	195.7157			172.4335	154.3769	107.1525		113.76
10			116.9323				124.9983		127.4225	133.0871
15	122.0383		110.6759		135.4348		128.766		130.1861		101.4962	99.33855
20	81.5528		99.28367				86.86753		102.26
25	89.62399						90.67289		92.43816
30	88.26804		78.25004								88.38567
60	55.21923	107.8299					52.30682		105.6965		112.7291	107.0317
120	79.64447								70.7658
180	74.20971				76.07098				75.91937
240	69.74661				82.09533			90.05146	88.95419
300	63.70375				57.04927
